# Supplementary material for: Building AuxInYeast Synthetic Biology Strains for Biochemical Characterization of Maize Auxin Hormone Signaling Components
Source: HighWire-hosted journal article supplement (doi:10.1101/pdb.prot108634), 2025-03-12
Supplement: Supplemental_Table_S1.xlsx [file Supplemental_Table_S1.xlsx]

## Sheet: Sheet1
AuxInYeast Integrating Plasmids
Final plasmid name	E.coli Selection	Yeast Selection	GoldenGate Reaction Fragments	Final Plasmid Sequence
p8G-ZmAFB2	Ampicillin/Carbenicillin	HIS3	plasmid 8GF-ccdB and insert 1 fragment	CAGCAATAAACCAGCCAGCCGGAAGGGCCGAGCGCAGAAGTGGTCCTGCAACTTTATCCGCCTCCATCCAGTCTATTAATTGTTGCCGGGAAGCTAGAGTAAGTAGTTCGCCAGTTAATAGTTTGCGCAACGTTGTTGCCATTGCTACAGGCATCGTGGTGTCACGCTCGTCGTTTGGTATGGCTTCATTCAGCTCCGGTTCCCAACGATCAAGGCGAGTTACATGATCCCCCATGTTGTGCAAAAAAGCGGTTAGCTCCTTCGGTCCTCCGATCGTTGTCAGAAGTAAGTTGGCCGCAGTGTTATCACTCATGGTTATGGCAGCACTGCATAATTCTCTTACTGTCATGCCATCCGTAAGATGCTTTTCTGTGACTGGTGAGTACTCAACCAAGTCAT…
p4G-Rel2N91-ZmIAA14	Ampicillin/Carbenicillin	TRP1	backbone 2 amplicon and insert 2 fragment	TCGCGCGTTTCGGTGATGACGGTGAAAACCTCTGACACATGCAGCTCCCGGAGACGGTCACAGCTTGTCTGTAAGCGGATGCCGGGAGCAGACAAGCCCGTCAGGGCGCGTCAGCGGGTGTTGGCGGGTGTCGGGGCTGGCTTAACTATGCGGCATCAGAGCAGATTGTACTGAGAGTGCACCAGTTTAAACCATTTAATAGAACAGCATCGTAATATATGTGTACTTTGCAGTTATGACGCCAGATGGCAGTAGTGGAAGATATTCTTTATTGAAAAATAGCTTGTCACCTTACGTACAATCTTGATCCGGAGCTTTTCTTTTTTTGCCGATTAAGAATTAATTCGGTCGAAAAAAGAAAAGGAGAGGGCCAAGAGGGAGGGCATTGGTGACTATTGA…
p4G-EYFP-ZmIAA14	Ampicillin/Carbenicillin	TRP1	backbone 3 amplicon and insert 2 fragment	TCGCGCGTTTCGGTGATGACGGTGAAAACCTCTGACACATGCAGCTCCCGGAGACGGTCACAGCTTGTCTGTAAGCGGATGCCGGGAGCAGACAAGCCCGTCAGGGCGCGTCAGCGGGTGTTGGCGGGTGTCGGGGCTGGCTTAACTATGCGGCATCAGAGCAGATTGTACTGAGAGTGCACCAGTTTAAACCATTTAATAGAACAGCATCGTAATATATGTGTACTTTGCAGTTATGACGCCAGATGGCAGTAGTGGAAGATATTCTTTATTGAAAAATAGCTTGTCACCTTACGTACAATCTTGATCCGGAGCTTTTCTTTTTTTGCCGATTAAGAATTAATTCGGTCGAAAAAAGAAAAGGAGAGGGCCAAGAGGGAGGGCATTGGTGACTATTGA…
p5G-ZmARF27	Ampicillin/Carbenicillin	LEU2	backbone 4 amplicon and insert 3 fragment	TCGCGCGTTTCGGTGATGACGGTGAAAACCTCTGACACATGCAGCTCCCGGAGACGGTCACAGCTTGTCTGTAAGCGGATGCCGGGAGCAGACAAGCCCGTCAGGGCGCGTCAGCGGGTGTTGGCGGGTGTCGGGGCTGGCTTAACTATGCGGCATCAGAGCAGATTGTACTGAGAGTGCACCATAGTTTAAACTCGACTACGTCGTAAGGCCGTTTCTGACAGAGTAAAATTCTTGAGGGAACTTTCACCATTATGGGAAATGGTTCAAGAAGGTATTGACTTAAACTCCATCAAATGGTCAGGTCATTGAGTGTTTTTTATTTGTTGTATTTTTTTTTTTTTAGAGAAAATCCTCCAATATATAAATTAGGAATCATAGTTTCATGATTTTCTGTTA…
p6G-AuxRE-VENUS	Ampicillin/Carbenicillin	URA3	backbone 5 amplicon and insert 4 fragment	TCGCGCGTTTCGGTGATGACGGTGAAAACCTCTGACACATGCAGCTCCCGGAGACGGTCACAGCTTGTCTGTAAGCGGATGCCGGGAGCAGACAAGCCCGTCAGGGCGCGTCAGCGGGTGTTGGCGGGTGTCGGGGCTGGCTTAACTATGCGGCATCAGAGCAGATTGTACTGAGAGTGCACCATAGTTTAAACTGTGGCTGTGGTTTCAGGGTCCATAAAGCTTTTCAATTCATCTTTTTTTTTTTTGTTCTTTTTTTTGATTCCGGTTTCTTTGAAATTTTTTTGATTCGGTAATCTCCGAGCAGAAGGAAGAACGAAGGAAGGAGCACAGACTTAGATTGGTATATATACGCATATGTGGTGTTGAAGAAACATGAAATTGCCCAGTATTCTTAAC…
Minimal Maize AuxInYeast Plasmid Parts
Backbone Amplicon	Plasmid Template	Plasmid DNA on Addgene	Forward (F) backbone primers	Reverse (R) backbone primers
1	8GF-ccdB	https://www.addgene.org/188445/	N/A	N/A
2	4G-REL2N91-ccdB	https://www.addgene.org/188444/	TATAAGGTCTCCTGATATTTATATCATTTTACGTTTCTCGT	TATAAGGTCTCCTTGATGTCCACCACCT
3	4G-EYFP-ccdB	https://www.addgene.org/83878/	TATAAGGTCTCCTGATATTTATATCATTTTACGTTTCTCGT	TATAAGGTCTCCTTGATGTCCACCACCT
4	5G-ccdB	https://www.addgene.org/83879/	TATAAGGTCTCCTGATATTTATATCATTTTACGTTTCTCGT	TATAAGGTCTCCCATTTTACGTTTCTCGTTCAG
5	6G-ccdB	https://www.addgene.org/83880/	TATAAGGTCTCCGTCGTGACTGGGAAAAC	TATAAGGTCTCCAAAACTAGAAACATGACAAGAACT
Insert Fragments	Insert Identity	DNA sequence	5' flanking sequence	3' flanking sequence
1	ZmAFB2	ATGACGTATTTCCCAGAAGAAGTCGTAGAACATATATTCTCATTCTTGCCTAGTCACTCAGACCGTAATACGGTCAGTTTGGTATGCAAGGTCTGGTACGAGGTAGAGAGGCTTTCCAGGAGGGCTGTGTTTGTCGGAAACTGTTACGCCGTAAGACCGGAGAGGGTTGTCTTGAGGTTTCCGAACATCAAGGCCTTAACGGTAAAGGGCAAGCCCCATTTTGCGGATTTCAATCTAGTGCCGCCGGACTGGGGAGGATATGCCGGACCTTGGATAGATGCTGCCGCCAGGTCATGCGTTGGATTGGAGGAATTACGTATGAAACGTATGGTCGTCTTCGACGAGAATCTGGAGTTATTAGCAAGGTCATTTTTGAGATTTAAAGTATTAGTTCTAATT…	TATAAGGTCTCC	GATTGGAGACCTTATA
2	ZmIAA14	ATGGCTGGCGCCGACGTCGACGTCGGGACGGAGCTCCGGCTCGGCCTGCCGGGAGGAGGCGCCGCGGCGGCCAAGAAGGACACCATCGACCTCAAGCTGAAGCTGCCCACCGCCGGCATGGAGGAGGCGGCTGCCGCCGCCAGGCCGGAGCCGGCAGCCGAGAAGGCCAAGAGGCCCGCCGAGGCGCCGGCCGCCGATGCCGAGAAGCCACCTGCACCCAAGGCACAGGCCGTGGGCTGGCCACCAGTCCGGTCGTACCGCAGGAACGCCATGACCGTCGTCCAGGCCGTGAGGAGCAAGAAGGAAGAGGAACCTGAGAAGCAGCAACAGCCCGCTGCCGCCAACGCCTTCGTGAAGGTCAGCATGGACGGCGCGCCCTACCTGCGCAAGGTGGACCTG…	TATAAGGTCTCC	TGGAGACCTTATA
3	ZmAFRF27	ATGAAGGATCACGGATCGGGCGGCGTCACTCCCAGCCCCGCAGAAGGGGAAAAGAAACCCATCAACTCGGAGCTGTGGCACGCTTGTGCGGGGCCCCTGGTGTCGTTGCCCCCGGTGGGCAGTCTCGTCGTATACTTCCCGCAGGGCCATAGTGAACAGGTTGCTGCTTCAATGCATAAGGAGCTGGACACCGTCCCCAGCTACCCATCTCTGCCTTCTAAGTTGATCTGCAAGCTCCTAAGTCTCACCTTACATGCAGATTCTGAAACTGATGAAGTTTATGCCCAGATGATGCTTCAGCCTGTGAACAAATATGATCGAGACGCAATGCTGGCATCTGAACTGGGTCTGAAACAAAACAAGCAACCAACAGAATTCTTTTGCAAGACGTTGACAGCA…	TATAAGGTCTCC	TGGAGACCTTATA
4	AuxRE-VENUS	AAACAGCACCAAACTTATATCTCTCATGTGACCGATCACCGCATCCTCAGTTGACCTATCTCTGCCCCCACTTTATCTCCCCACACAAACTGAATAACAAGAAGAAGAAGACTTTAGATATCAAATGACTCCACGTAtatctcccaaagggagataTCGATATTGGATTGGTTTTCATTGGTTGTATCGTGTGGACCAACGAAGCAACATATAAAAAGCACGACGCGGTGCCATTACTACAATAAGAGAAGTGTAGGAGAAGAAAGTTCTCATTTCATAATTGTATCAAATTGTGAGAGGAAAAAAAGAAGTTCAAGAAAAAATGCAGATTTTCGTCAAGACTTTGACCGGTAAAACCATAACATTGGAAGTTGAATCTTCCGATACCATCGACAACGT…	TATAAGGTCTCC	TGATGGAGACCTTATA
Colony PCR Primers
	Bacterial Colony PCR			Yeast Quality Control PCR
Integrated Plasmid	Forward primer	Reverse primer	Fragment length (bp)	Reverse primer (in yeast genome downstream of insert)	Forward primer (bind at 3' end of inserted DNA)	fragment length (bp)
p8G-ZmAFB2	GCGCCCAATTTCGT	CACCACTTTGTACAAGAAAGC	287	CGAAAATTTGGGTGGCCAACTCTC	ATTAGTTATGTCACGCTTACATTCACGCCC	1300
p4G-Rel2N91-ZmIAA14	GGGAGATTGGTTGATCC	ACCACTTTGTACAAGAAAGC	250	ATGGCTTGGCATGGCGATTTC	ATTAGTTATGTCACGCTTACATTCACGCCC	900
p4G-EYFP-ZmIAA14	GGGAGATTGGTTGATCC	ACCACTTTGTACAAGAAAGC	250	ATGGCTTGGCATGGCGATTTC	ATTAGTTATGTCACGCTTACATTCACGCCC	900
p5G-ZmARF27	GCTGGTCTATGTTGACC	ACCACTTTGTACAAGAAAGC	251	CTACAGAAGCAGAAATACACGCAGTCA	ATTAGTTATGTCACGCTTACATTCACGCCC	600
p6G-AuxRE-VENUS	CTGAGCAAAGACCCC	GCGTGAATGTAAGCGT	244	CTGTTCCAGCCCATATCCAACTTCC	ATTAGTTATGTCACGCTTACATTCACGCCC	900
Supplemental Table 1. Genetic parts for the creation of minimal maize synthetic auxin response modules. These are the primers, fragments, and plasmids needed to complete the building and integration of partial and full auxin response modules in yeast.
